# Supplementary material
Source: PubMed Central journal article supplement (PMC5471615)

Figure S1

**A** Neuron co-culture with  
PDAC cell lines  
(microfluidic device)

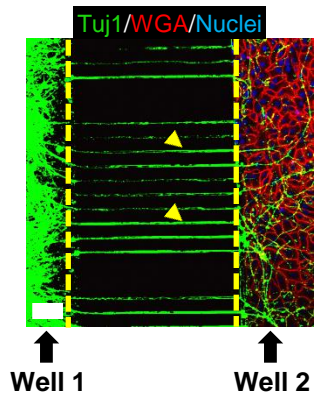

**B** Neuron co-culture with  
PanIN organoids  
(transwell system)

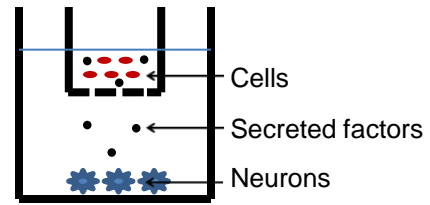

Figure S2

A

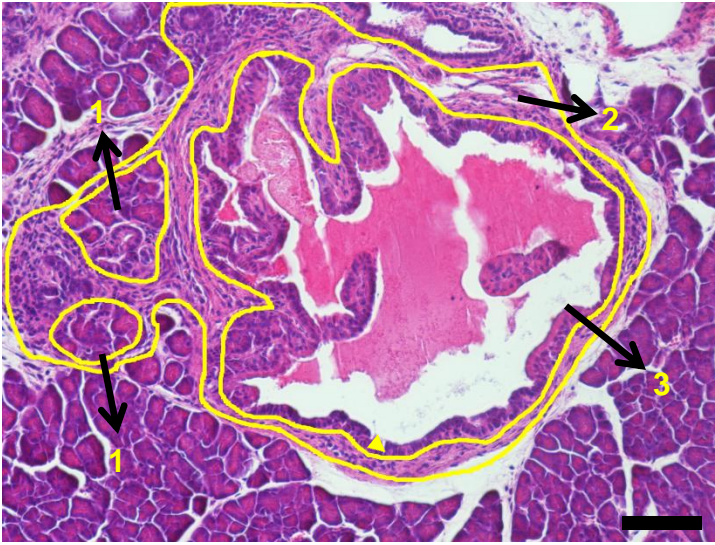

B

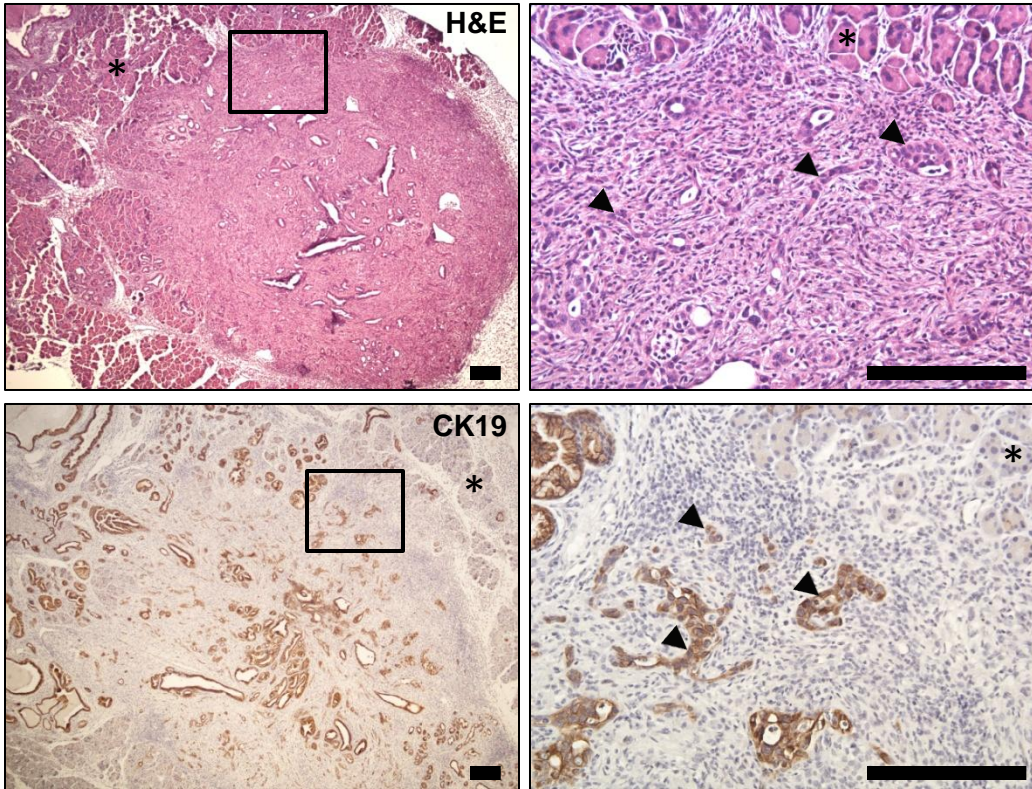

Figure S3

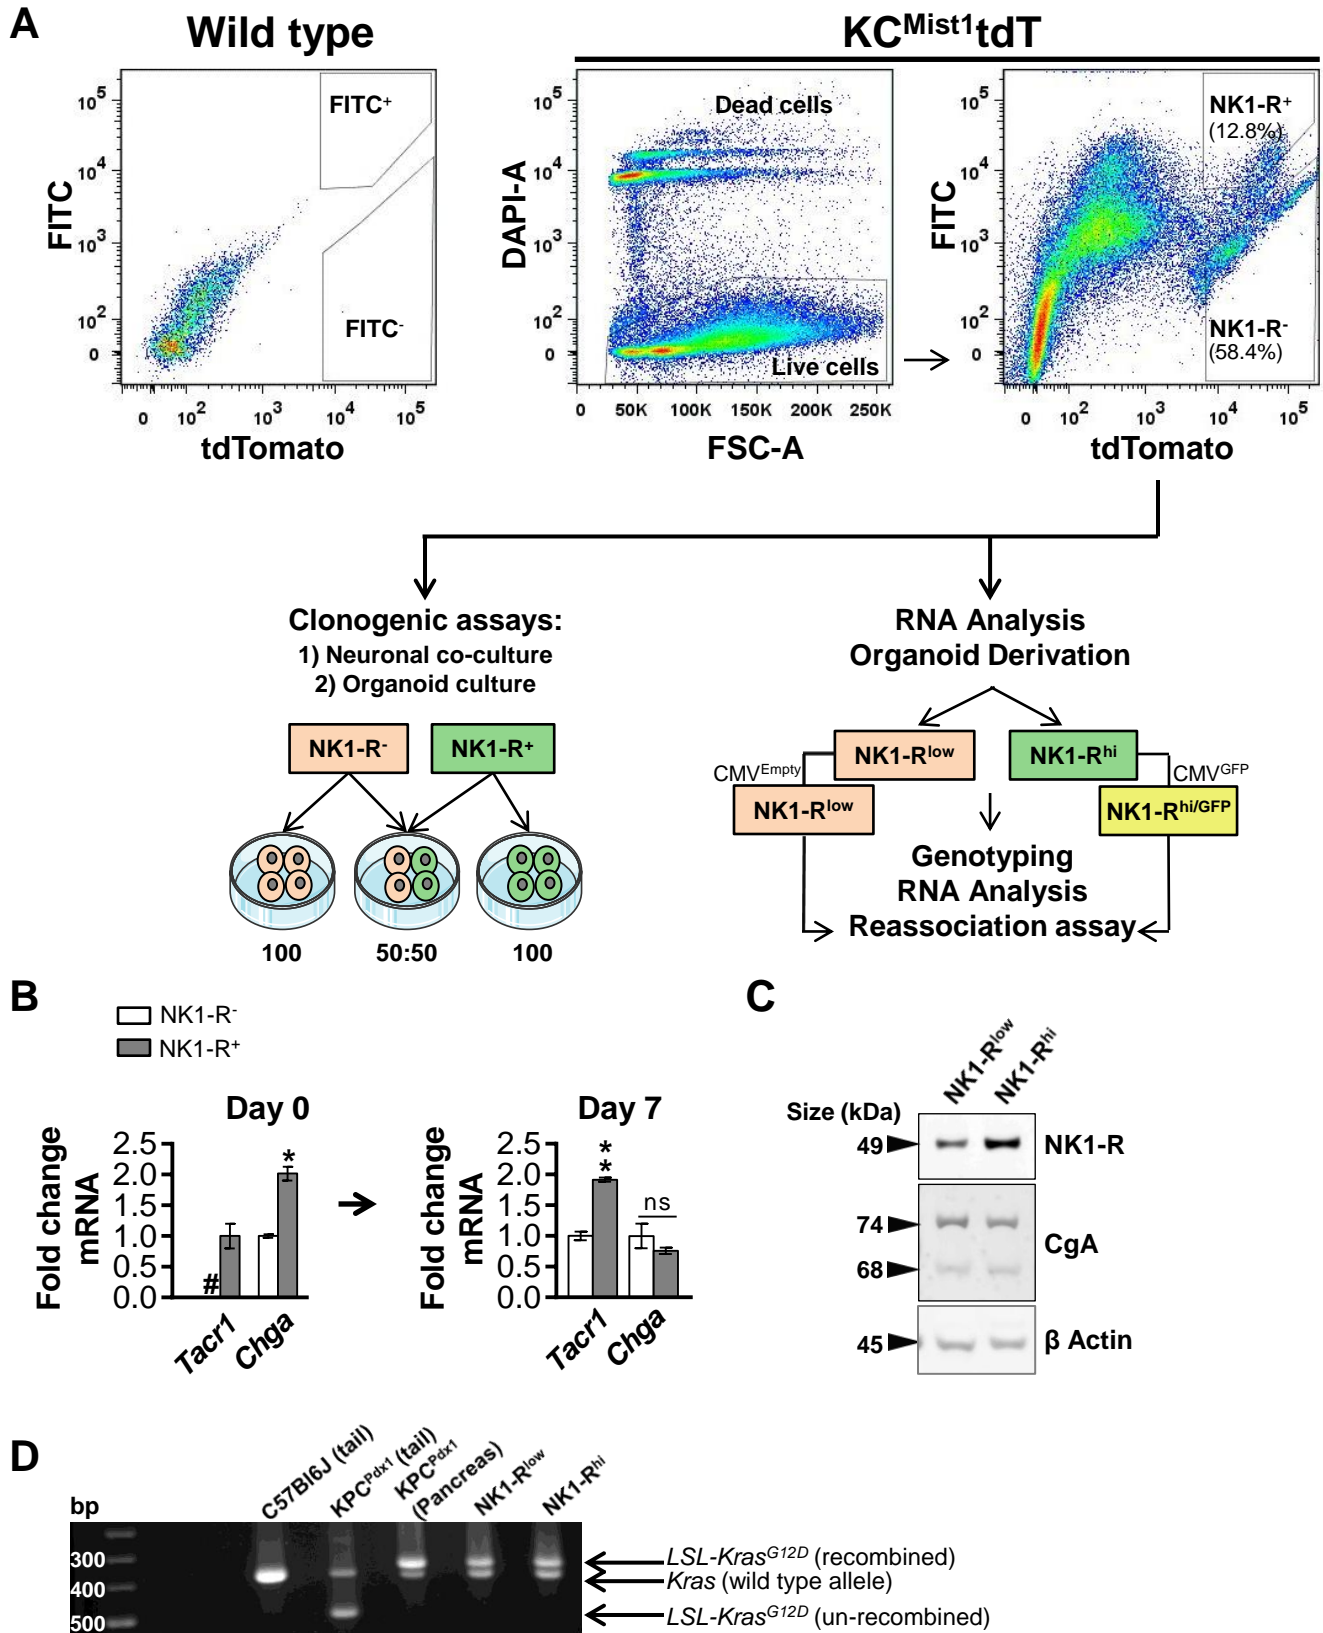



Figure S4

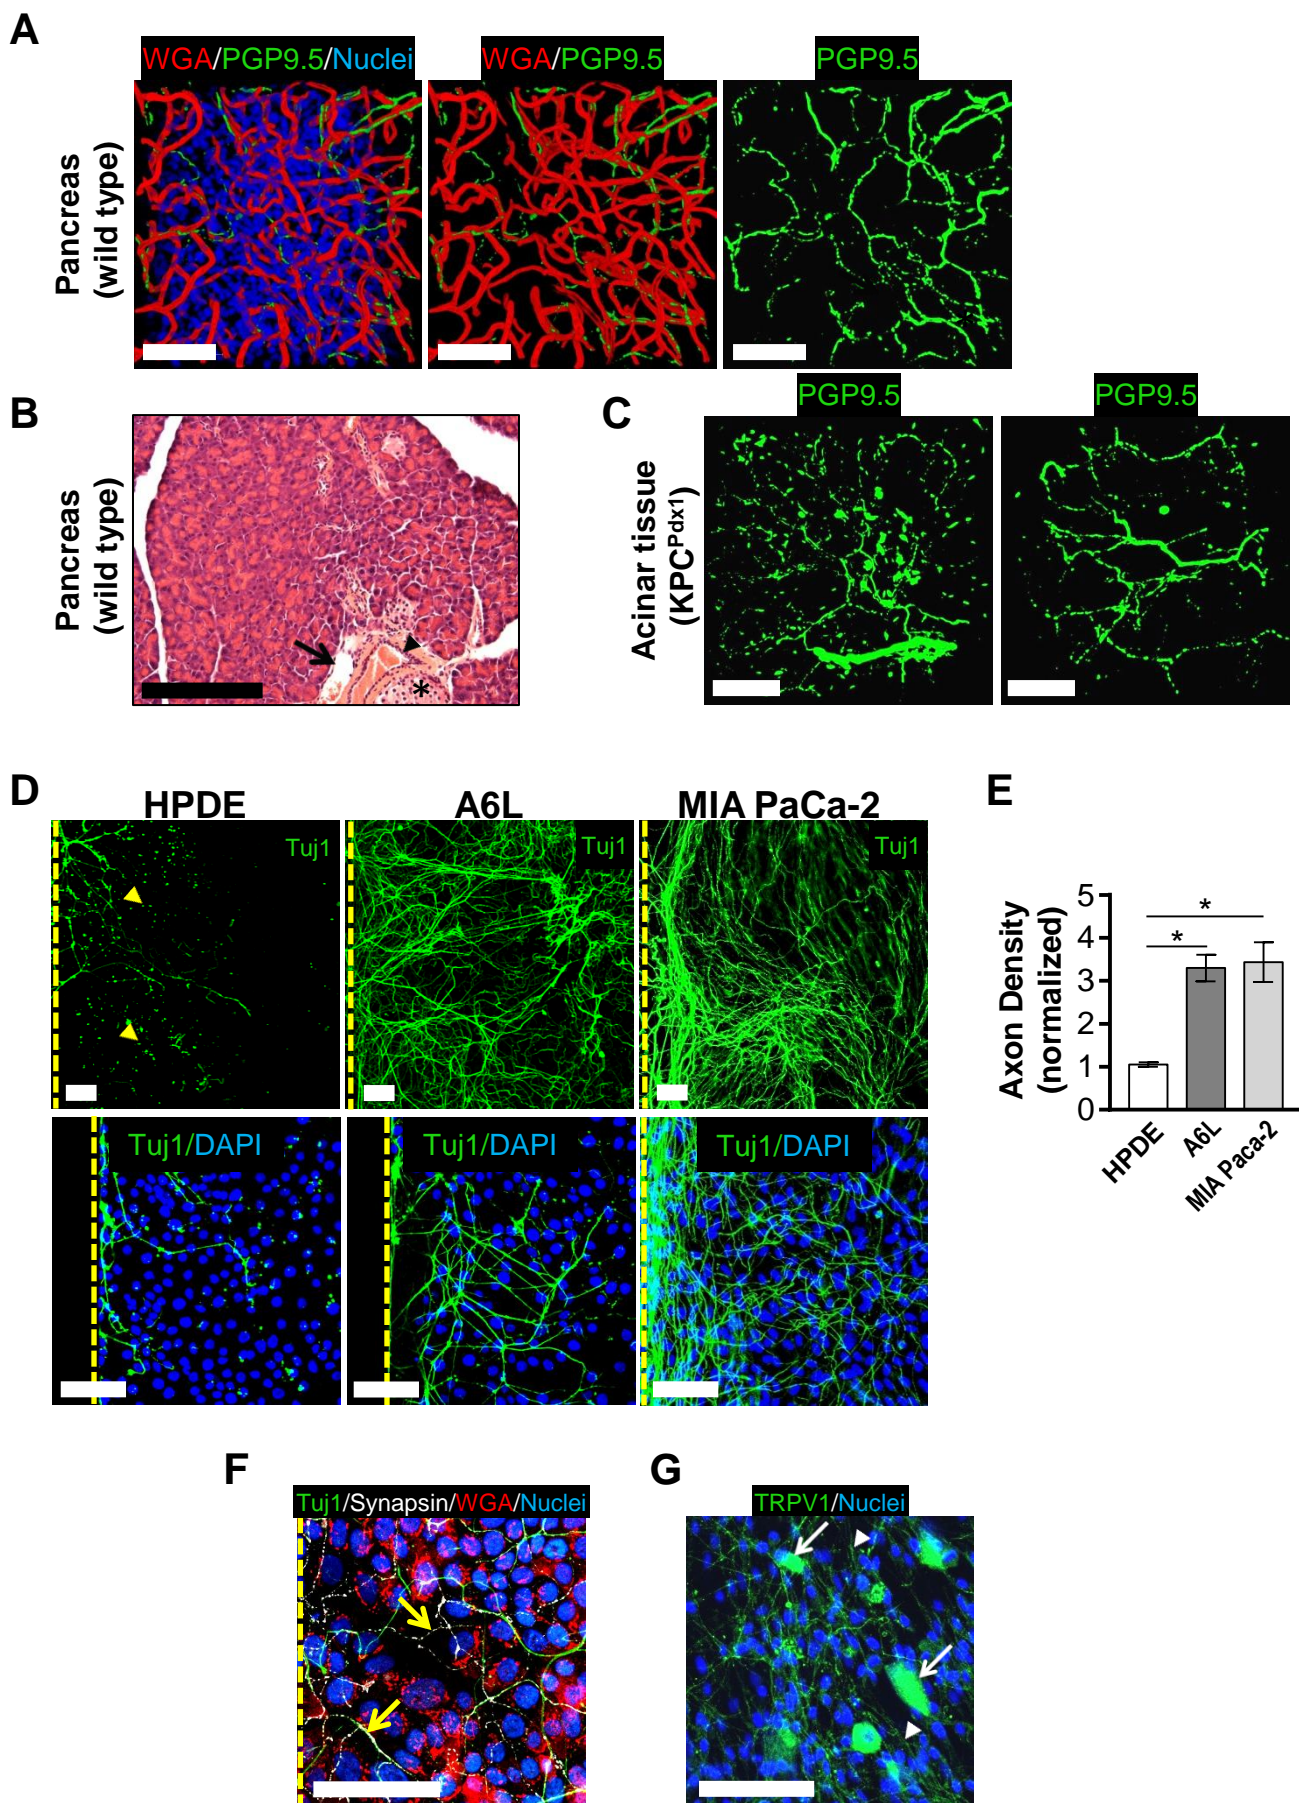



Figure S5

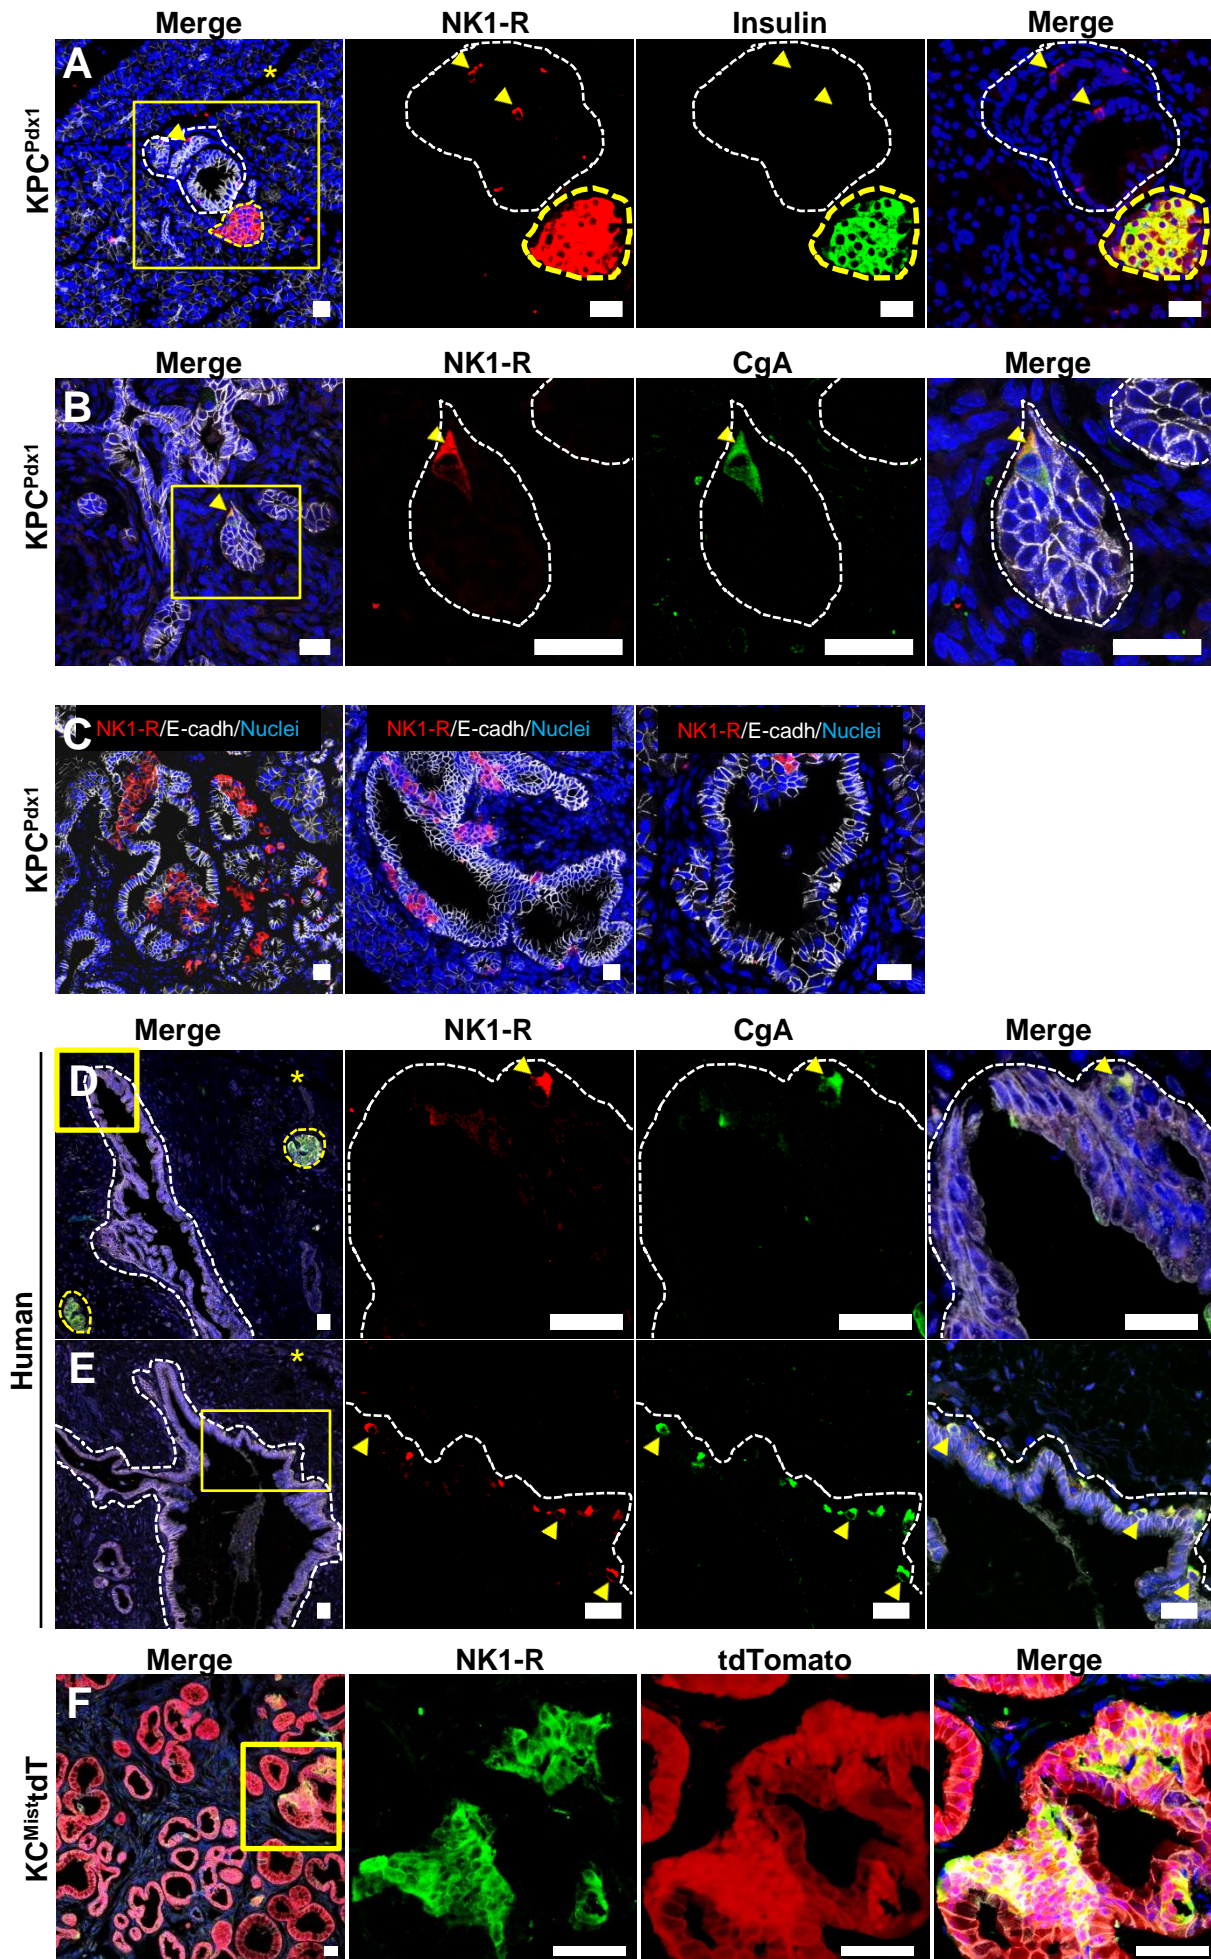

Figure S6

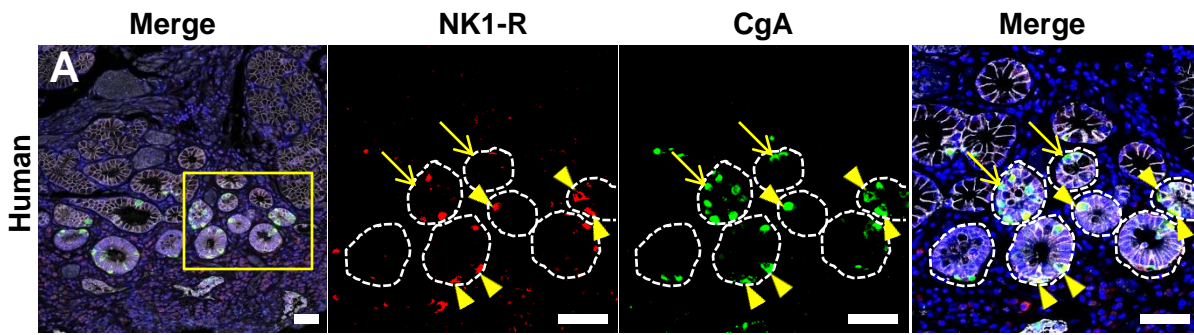

Figure S7

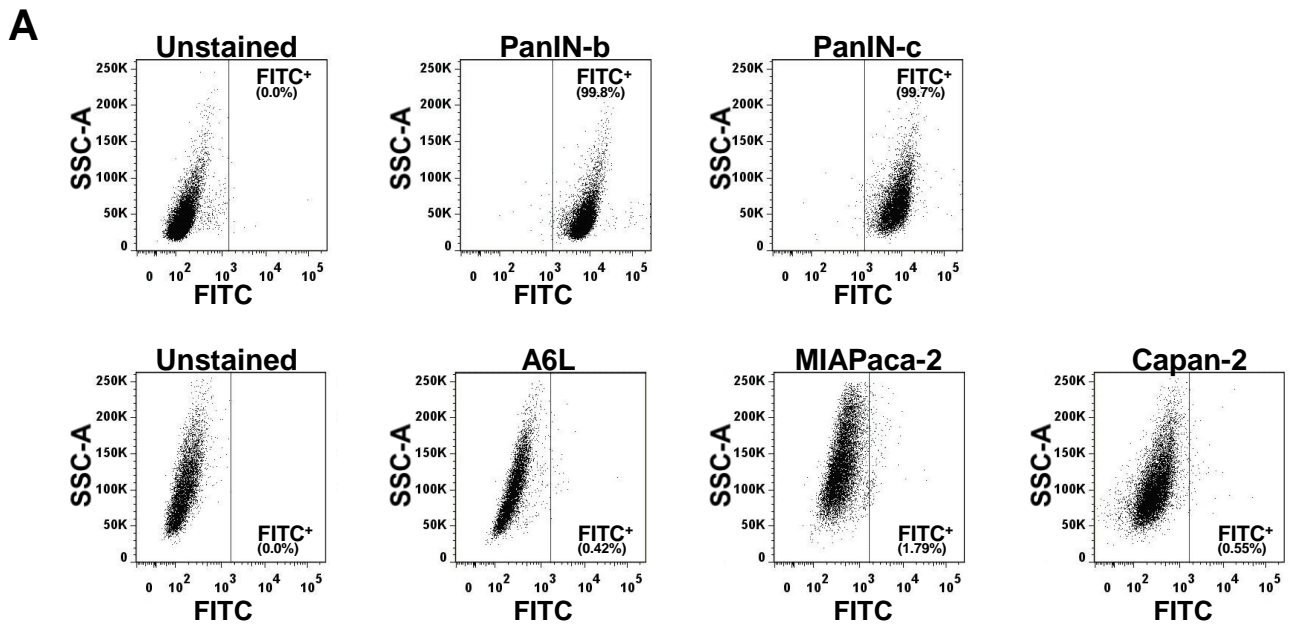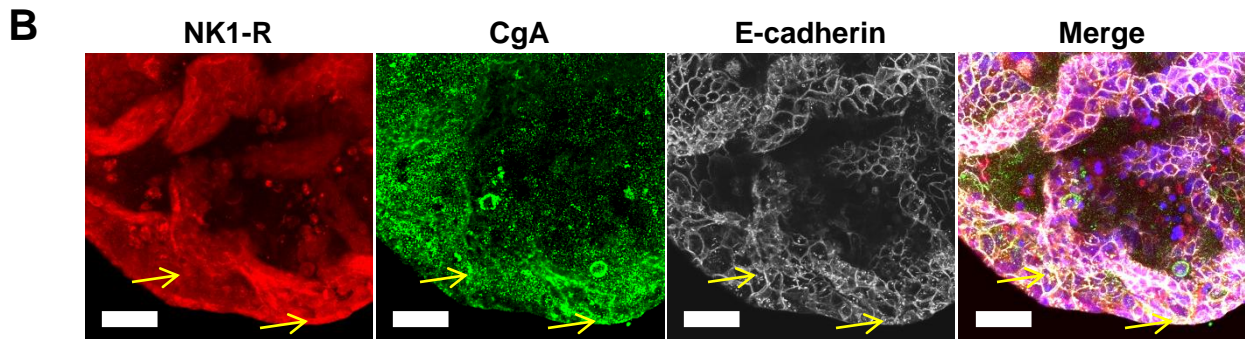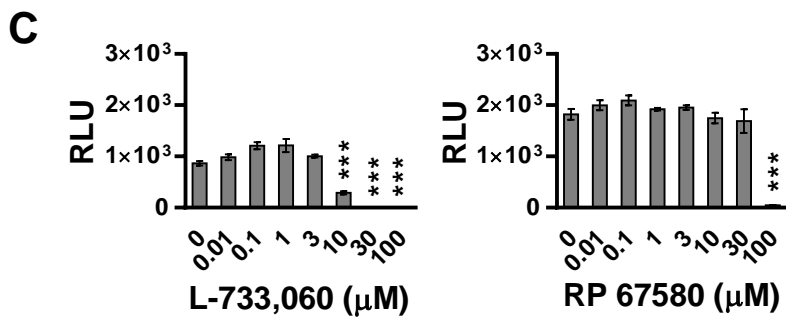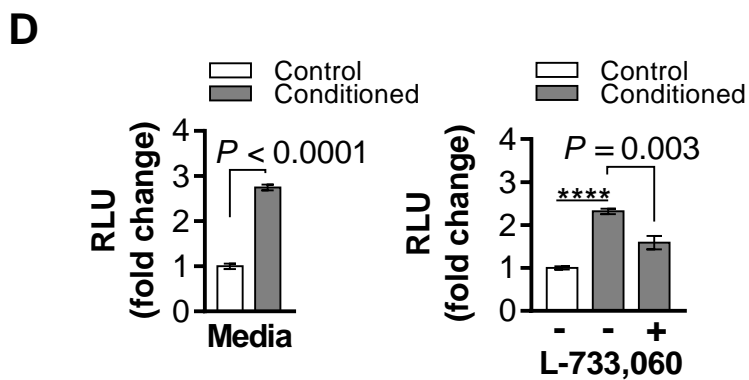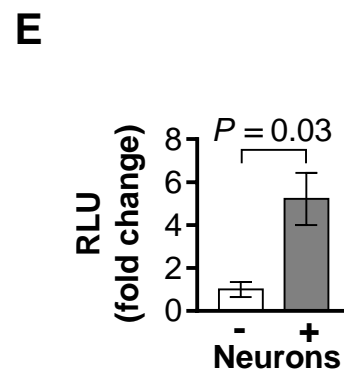



Figure S8

**A**

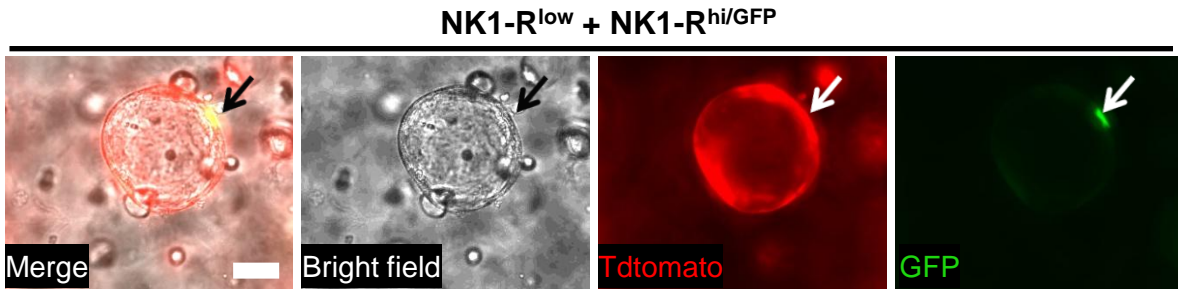

**B**

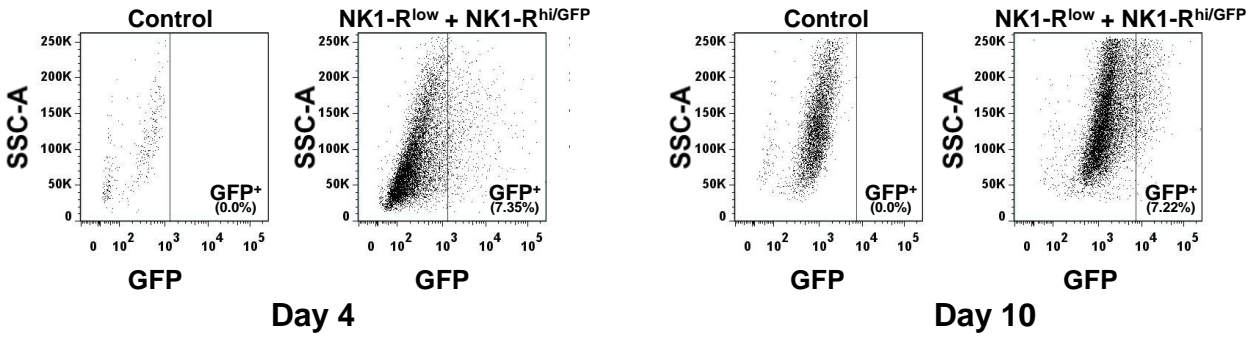

**C**

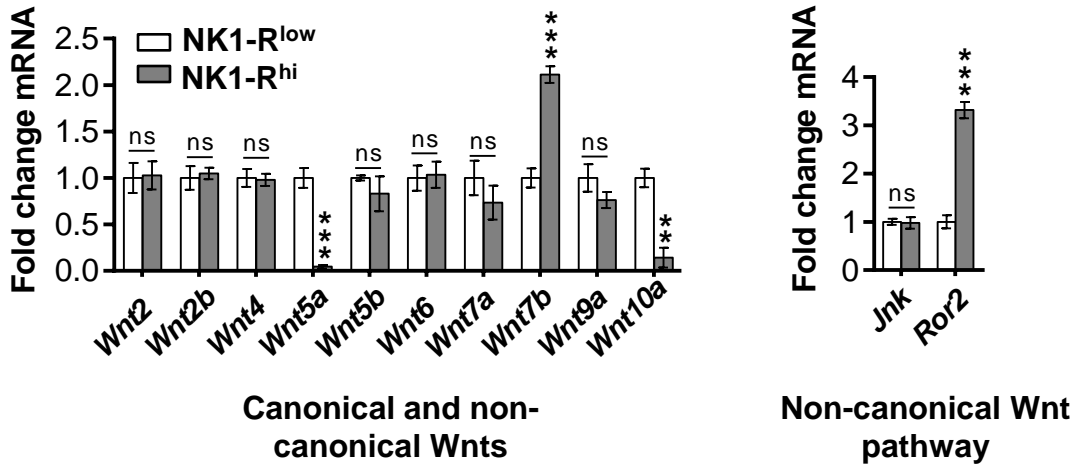

**D**

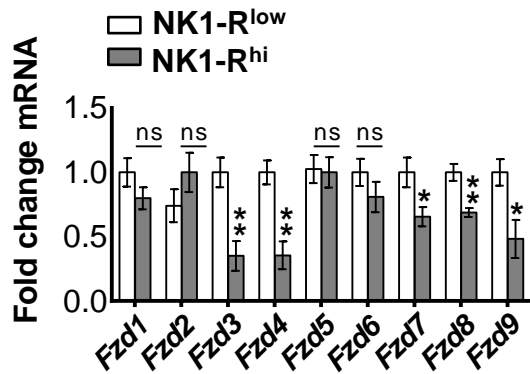

| Targets not detected |               |
|----------------------|---------------|
| <i>Wnt2</i>          | <i>Wnt9b</i>  |
| <i>Wnt3</i>          | <i>Wnt10b</i> |
| <i>Wnt3a</i>         | <i>Wnt16</i>  |
| <i>Wnt8a</i>         | <i>Egf</i>    |
| <i>Wnt8b</i>         | <i>Fzd10</i>  |
| <i>Wnt9a</i>         | <i>Camk2a</i> |

**E**

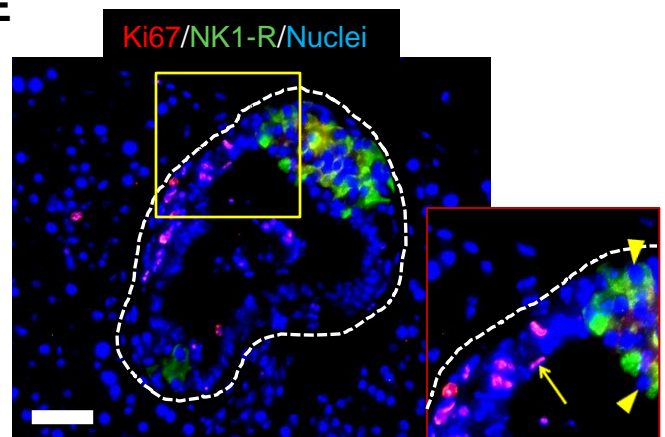



Figure S9

**A**

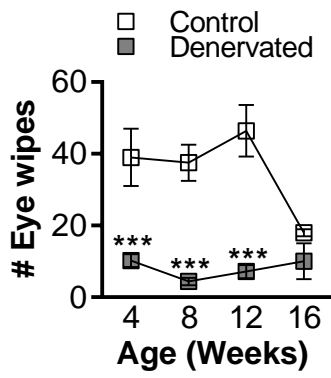

**B**

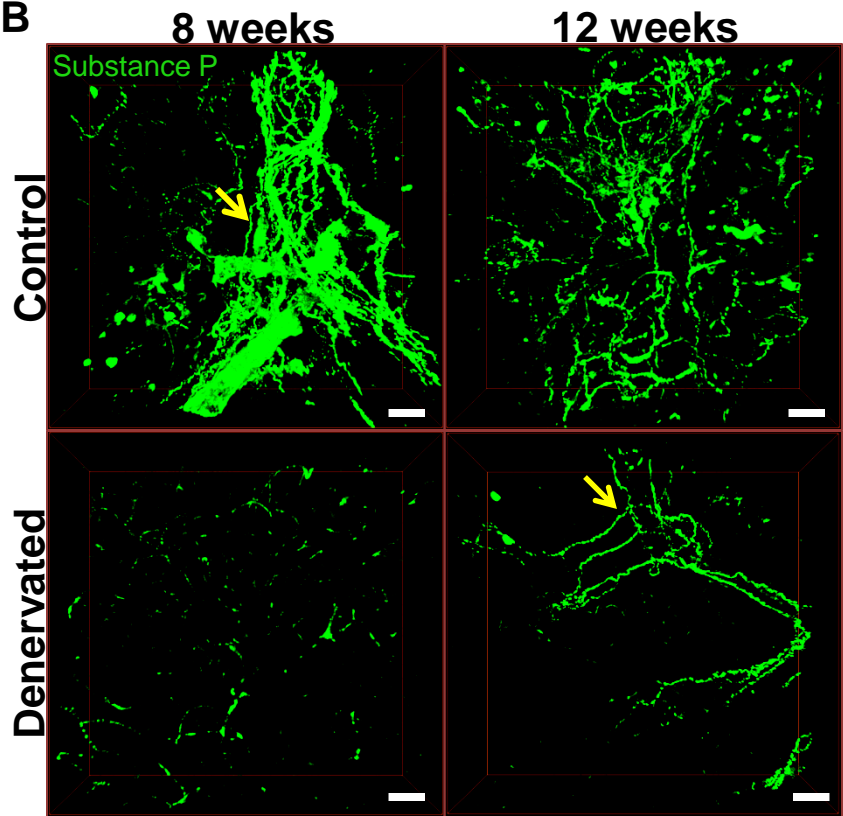

**C**

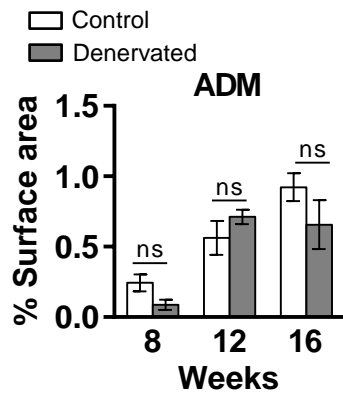

**D**

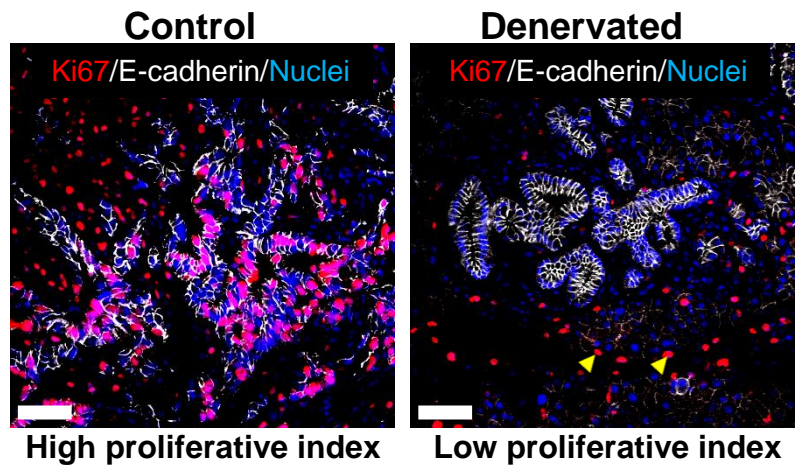

Figure S10

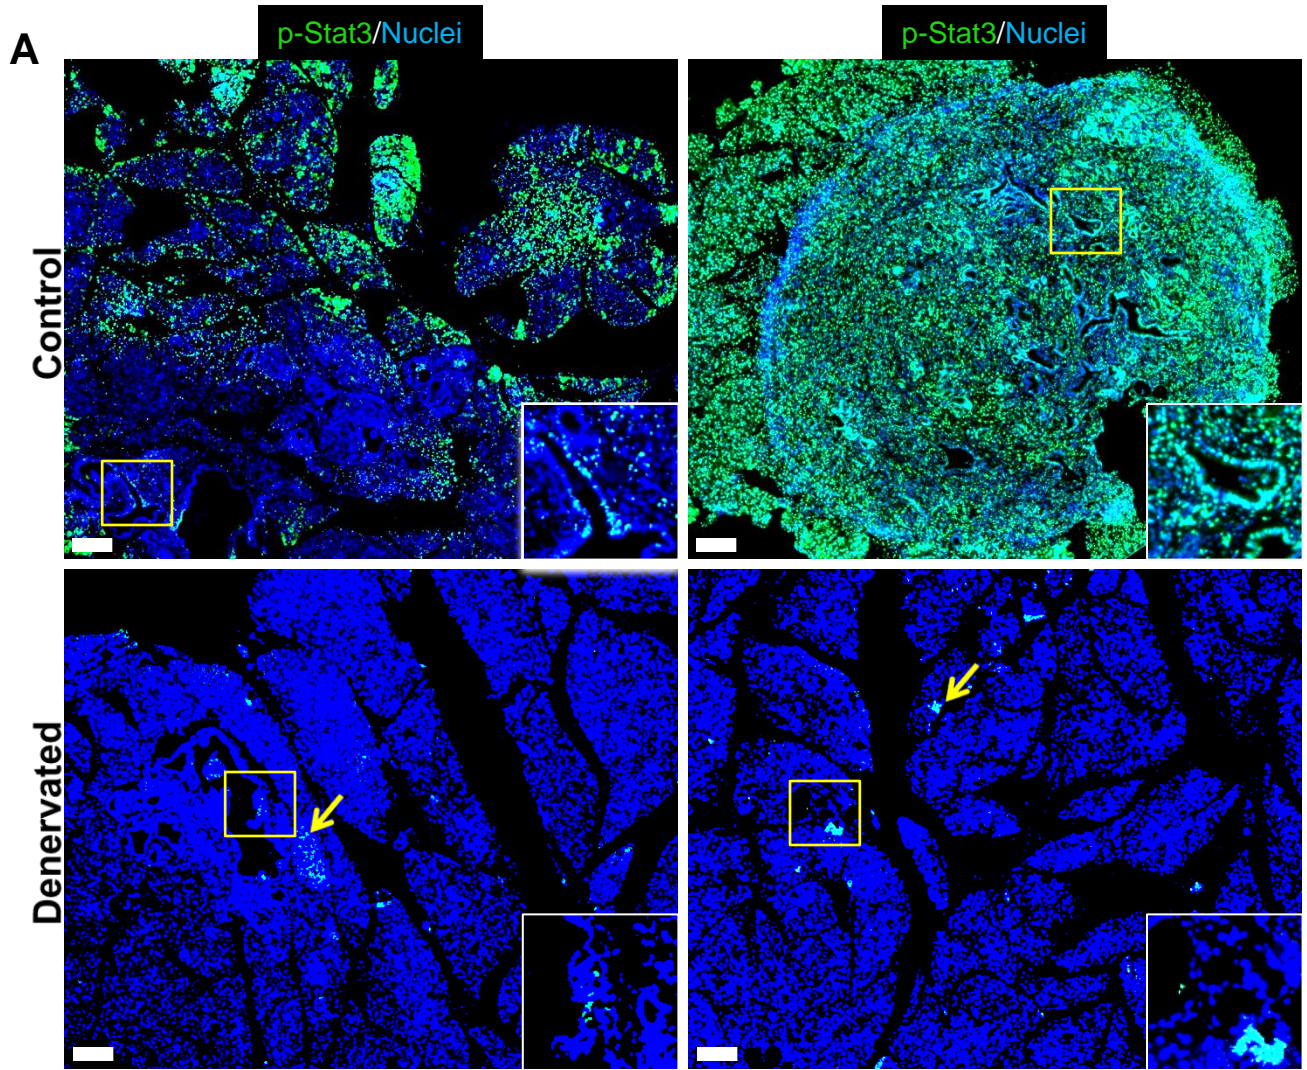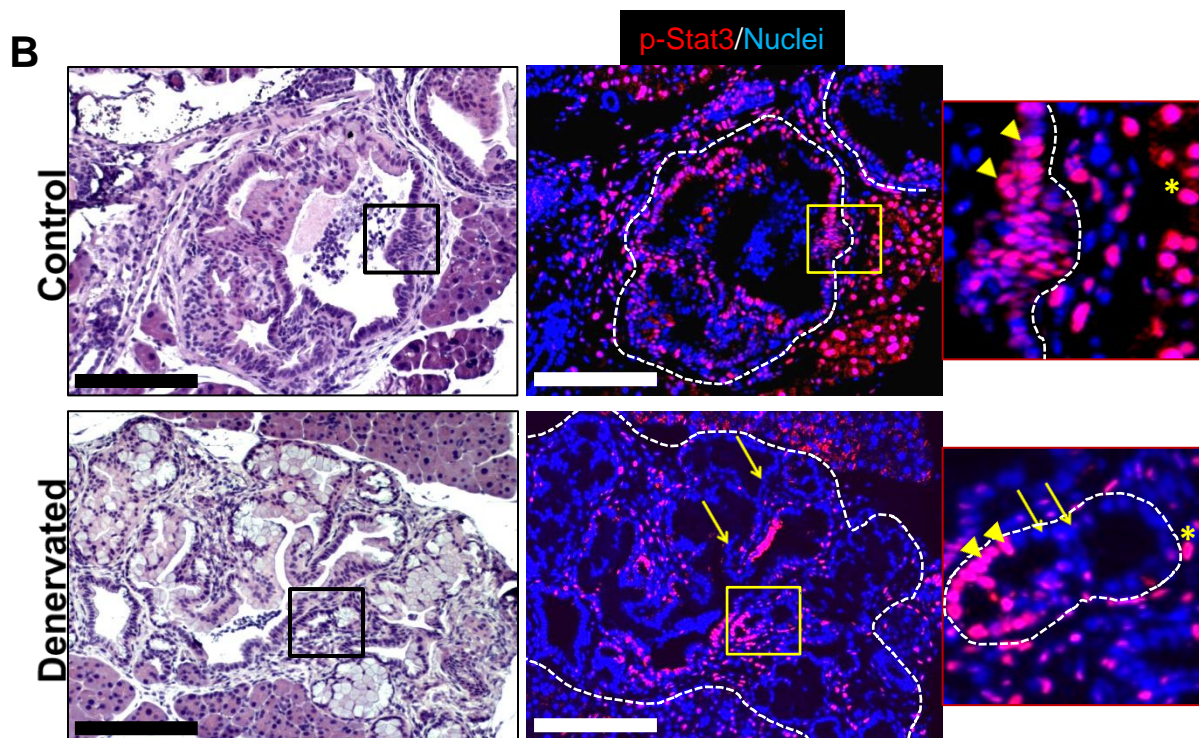

**A**

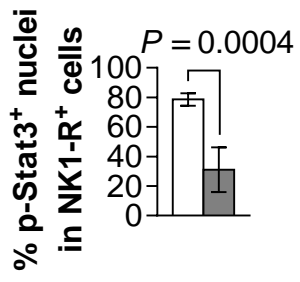

Supplement: NIHMS845414-supplement-3.pdf [file NIHMS845414-supplement-3.pdf]
